# Supplementary material for: Aldehyde dehydrogenase 2 preserves kidney function by countering acrolein-induced metabolic and mitochondrial dysfunction
Source: PubMed Central journal article supplement (PMC11466184; doi:10.1172/jci.insight.179871), 2024-10-08

Figure 2C

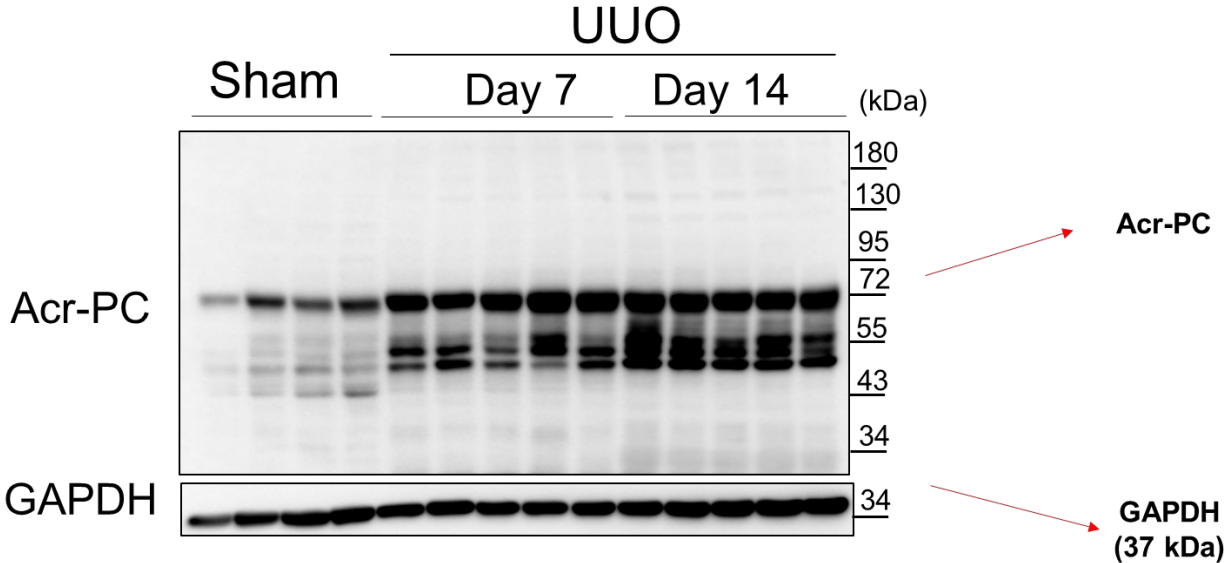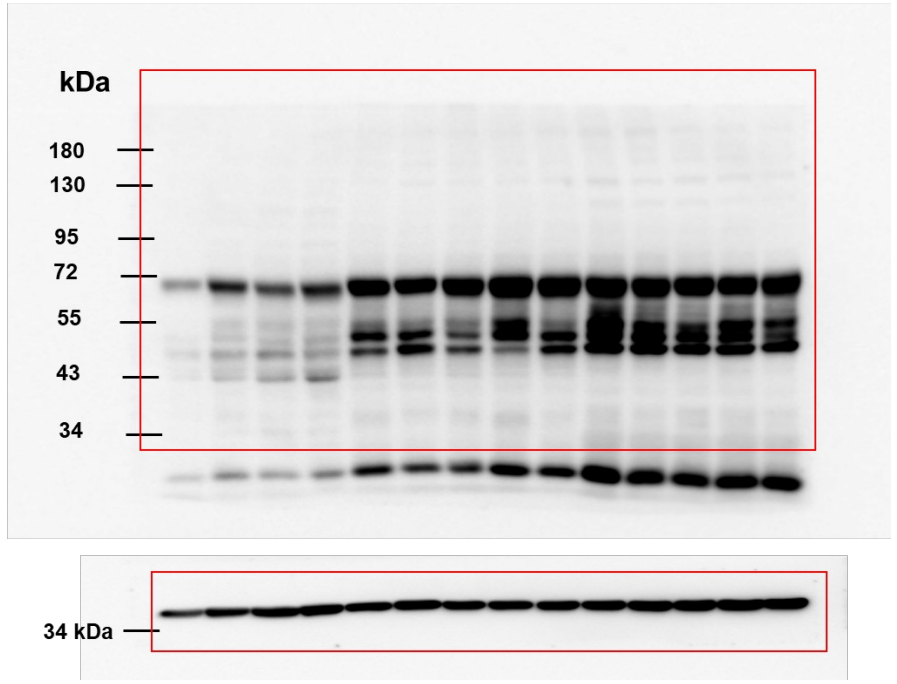

Figure 2D

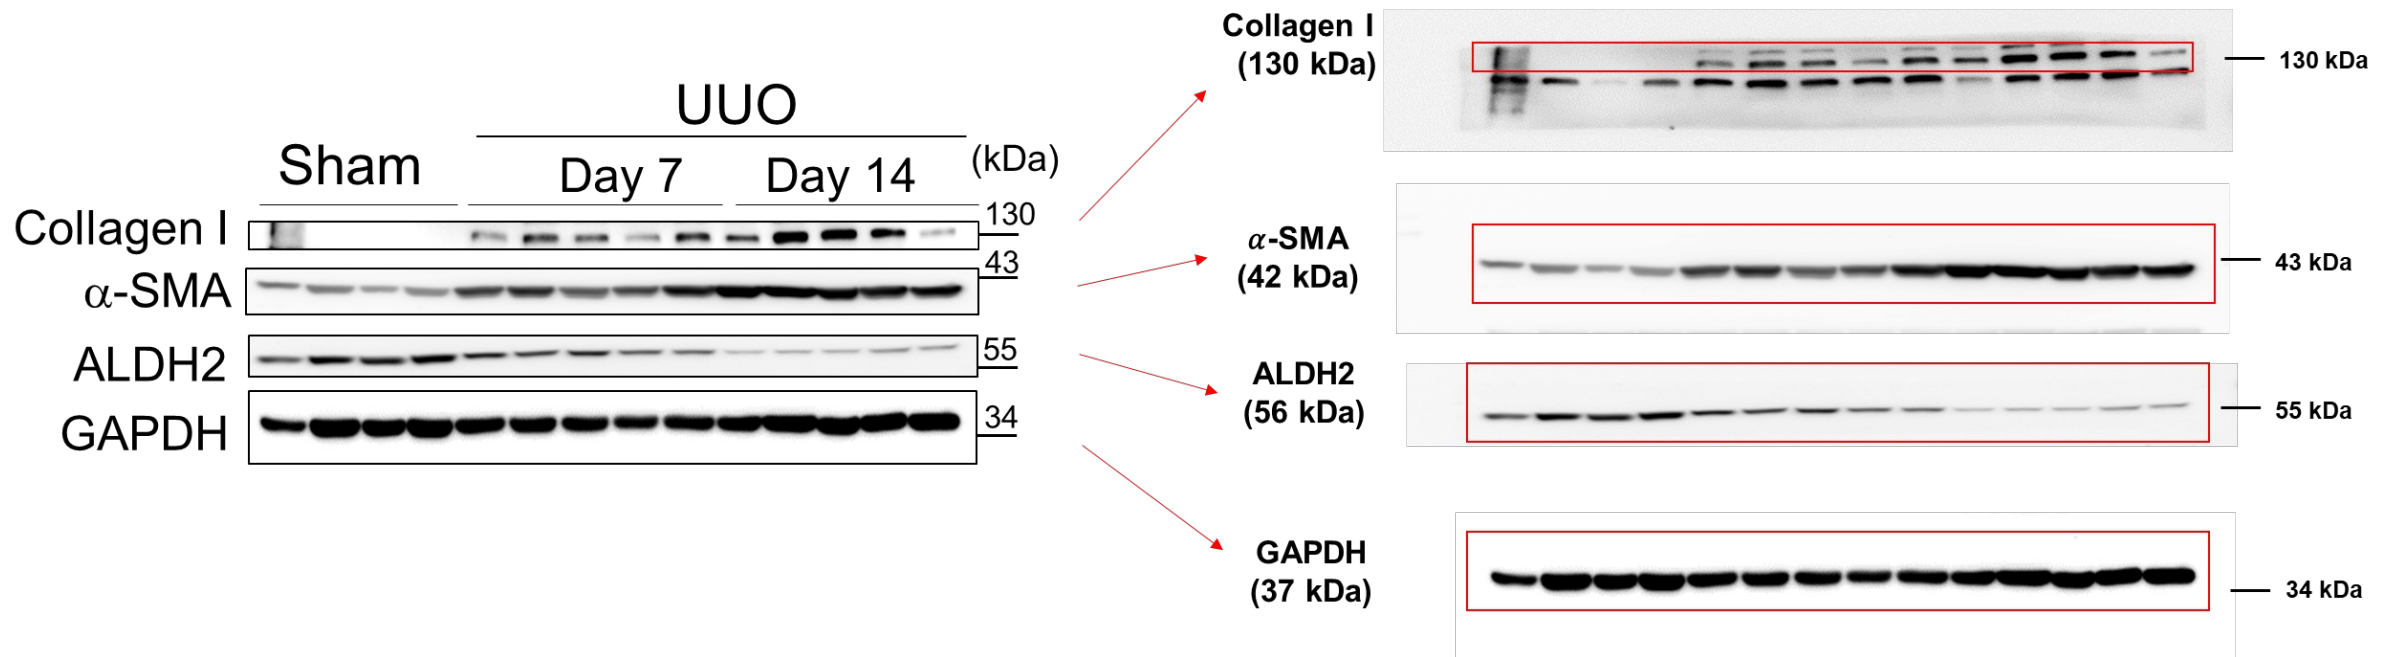

Figure 3D

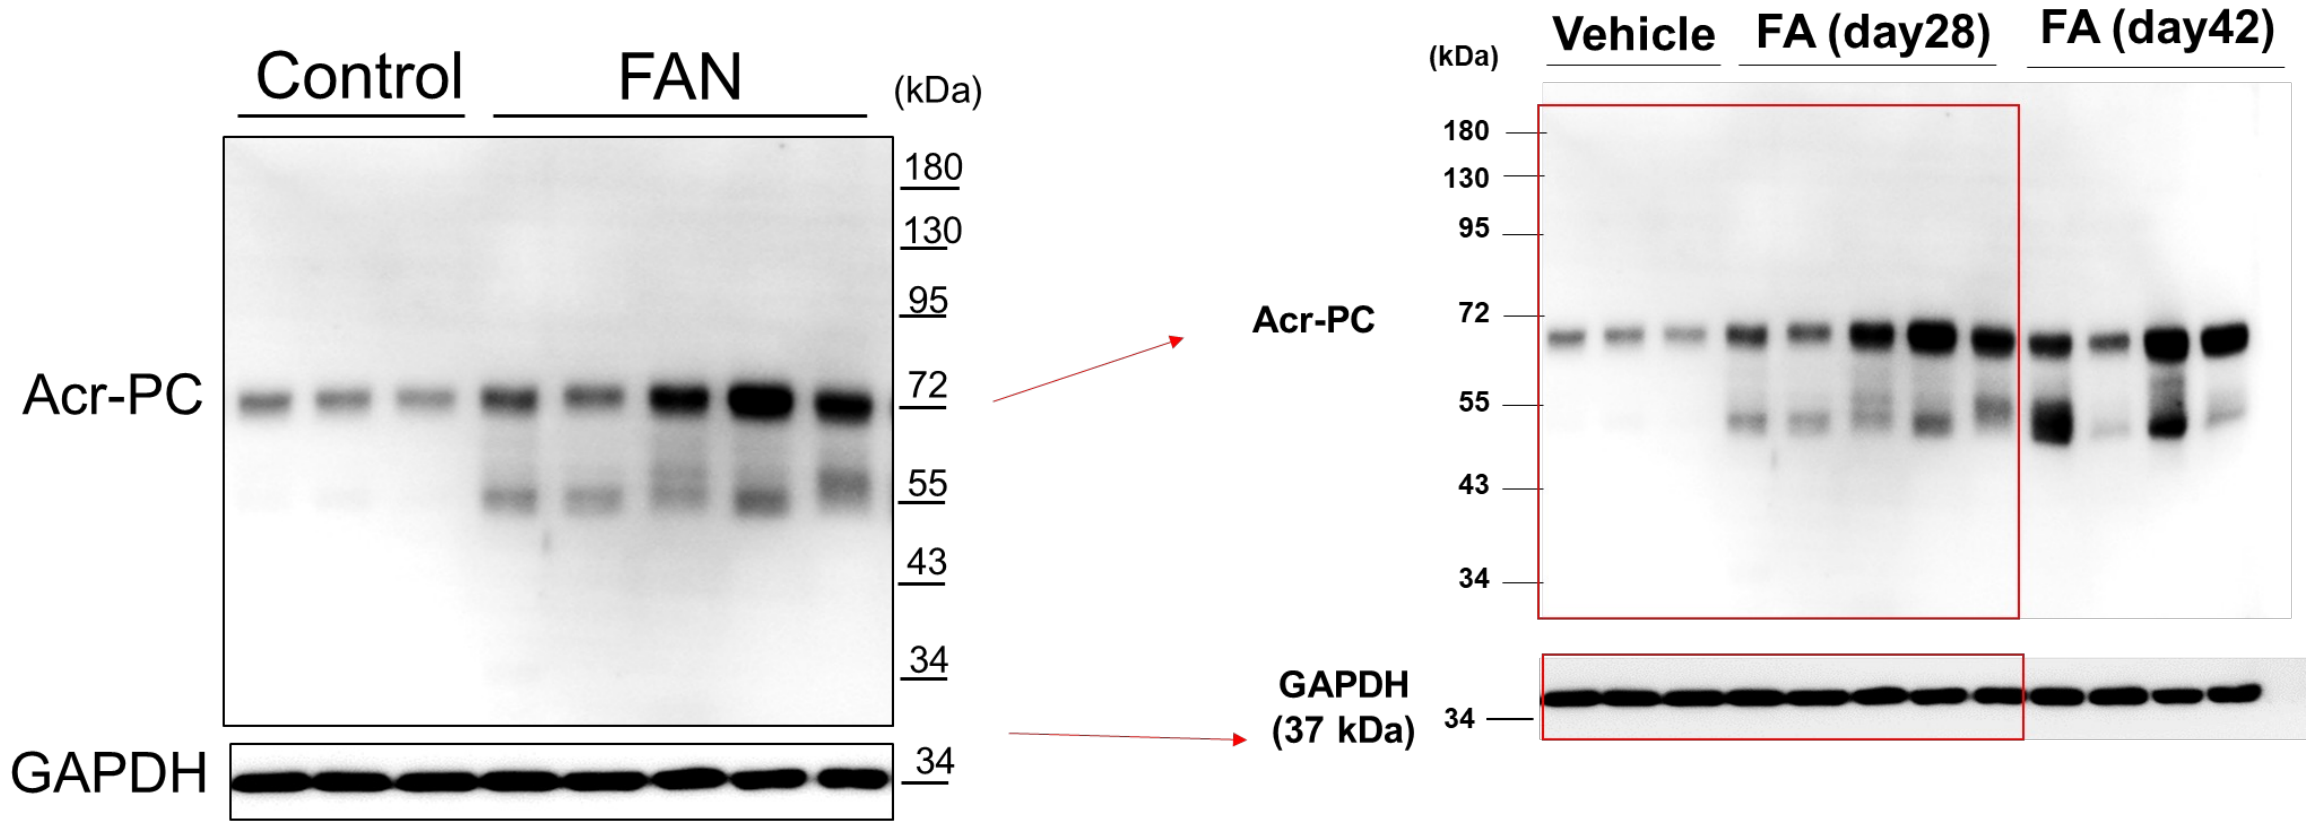

Figure 3E

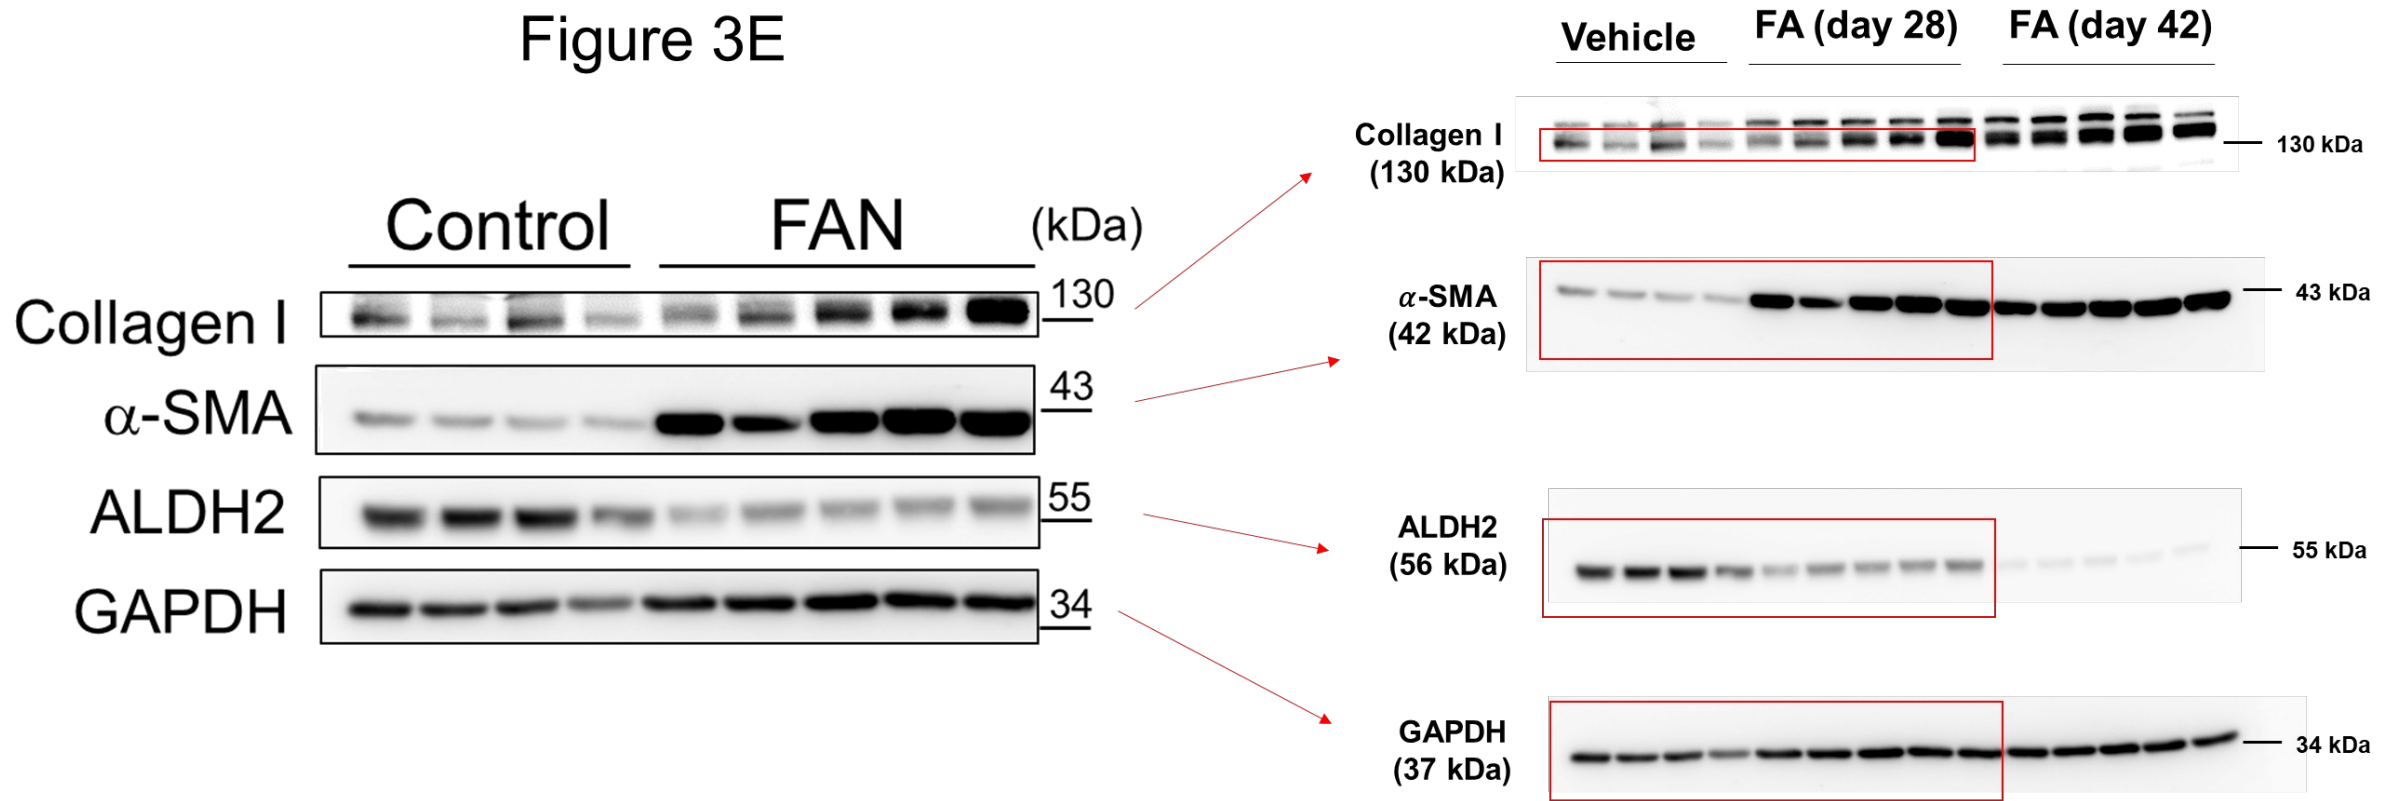

Figure 4B

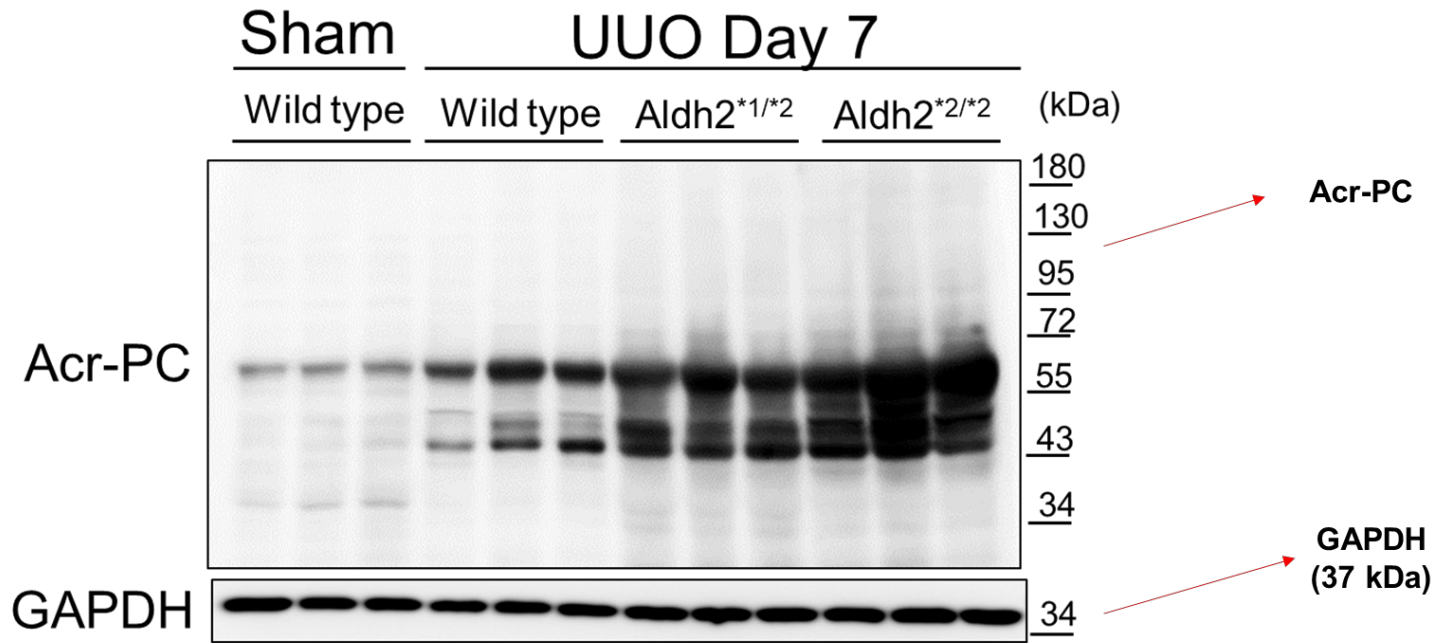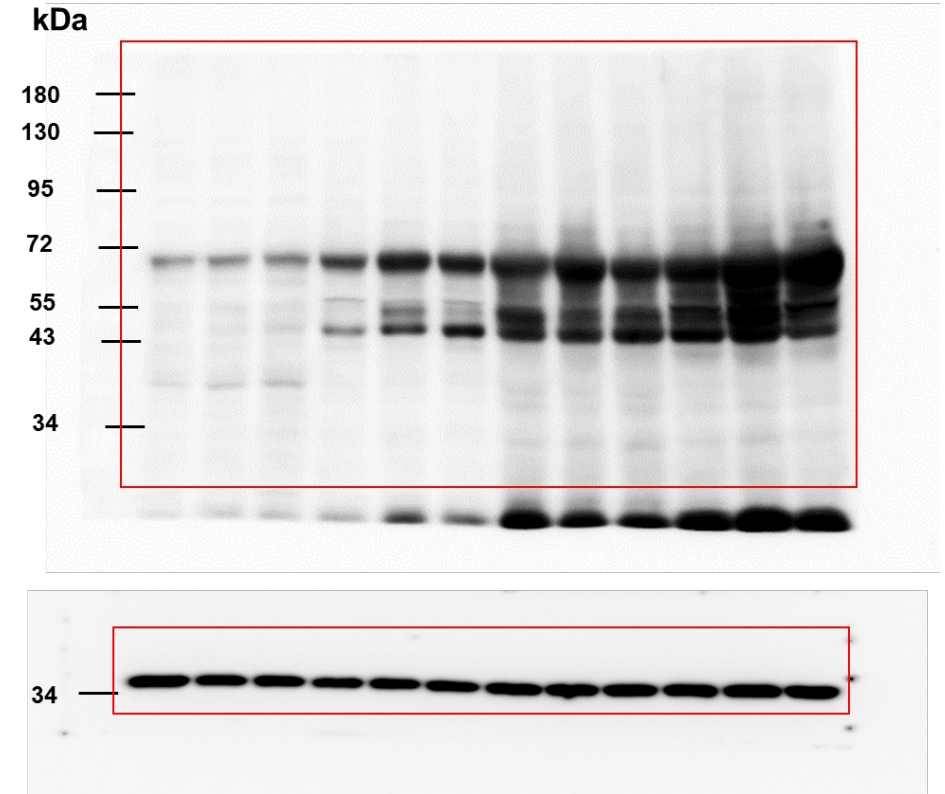

Figure 4C

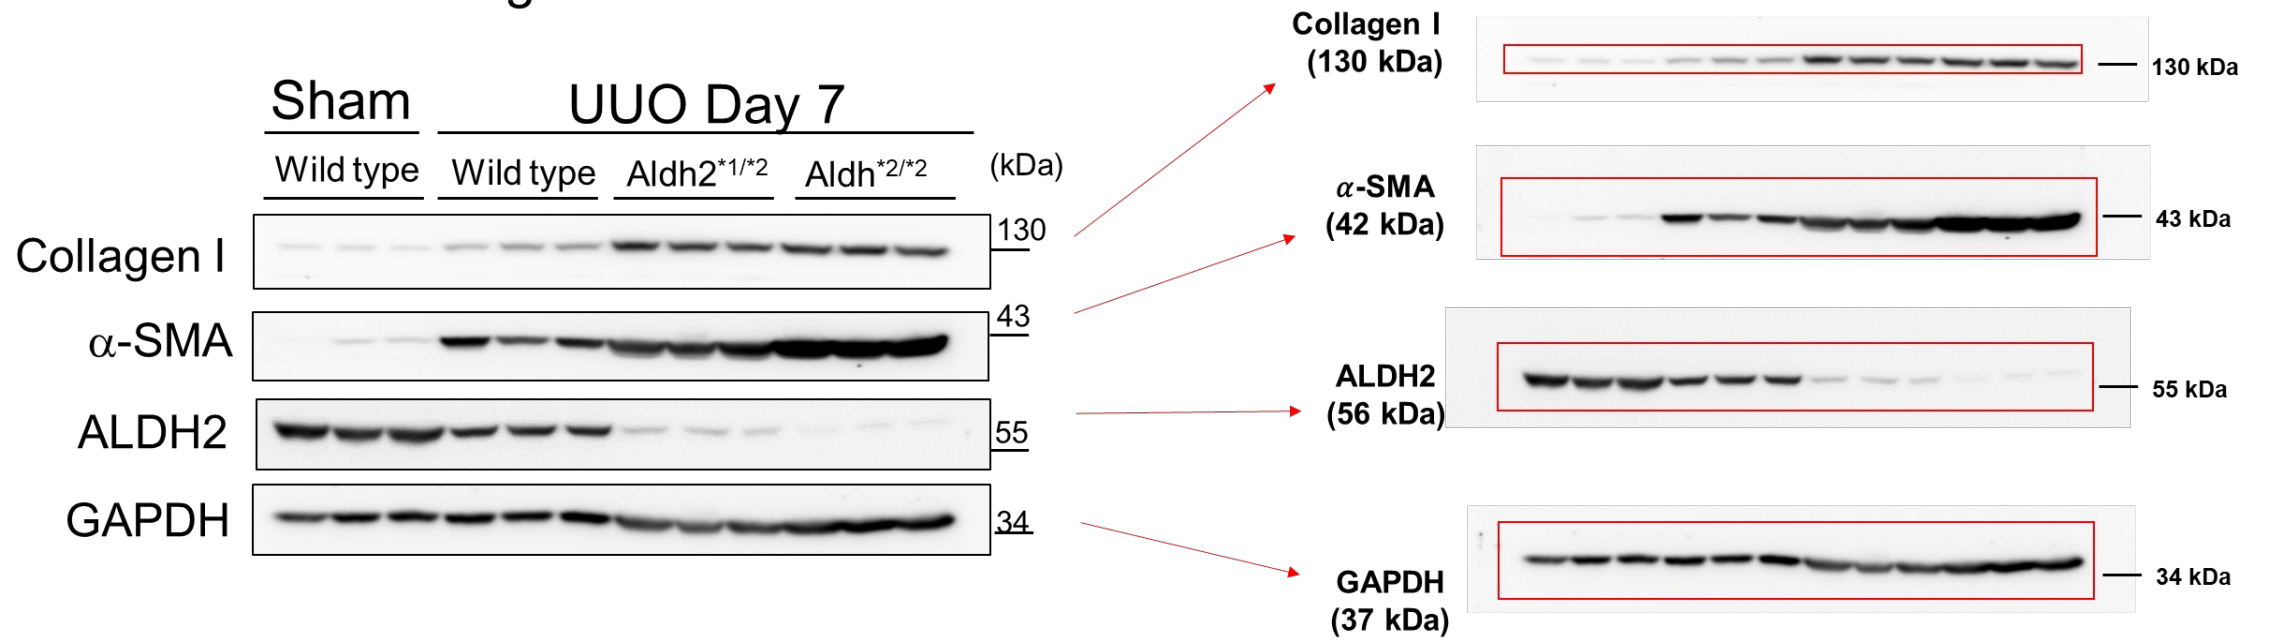

Figure 5C

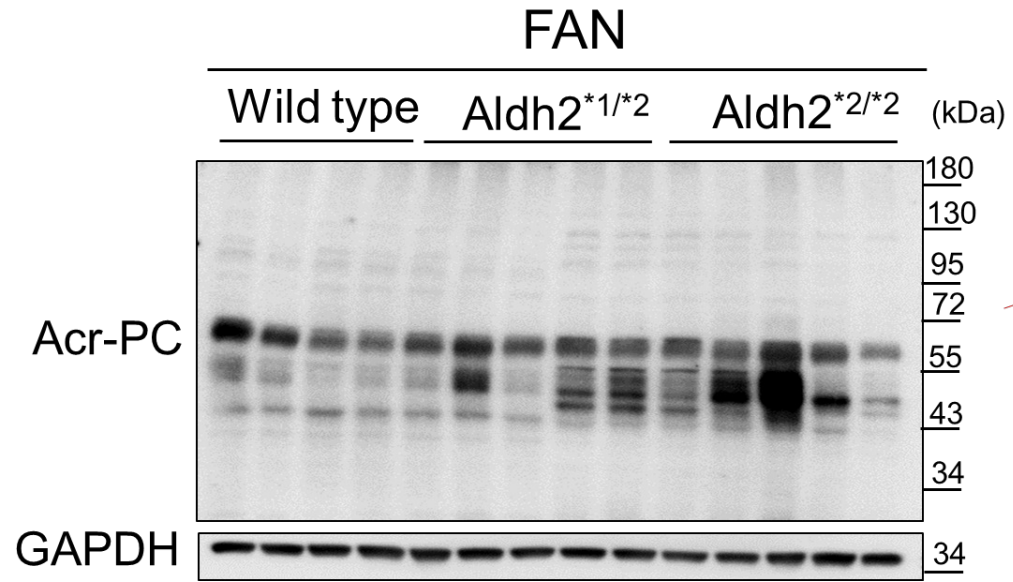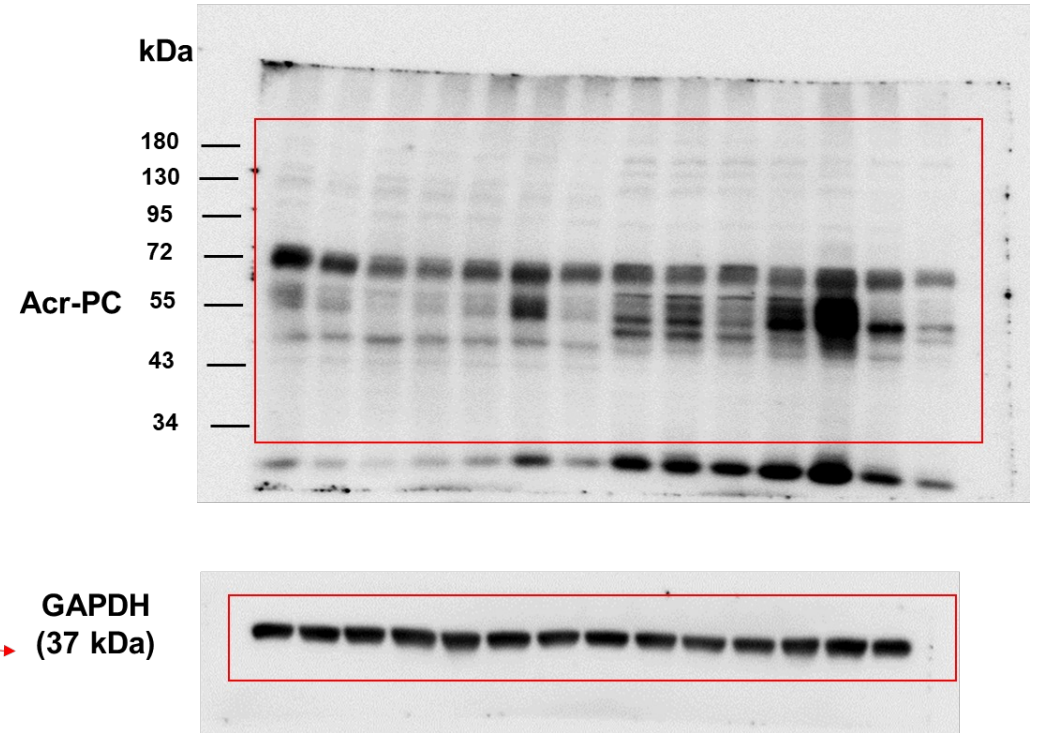



Figure 5D

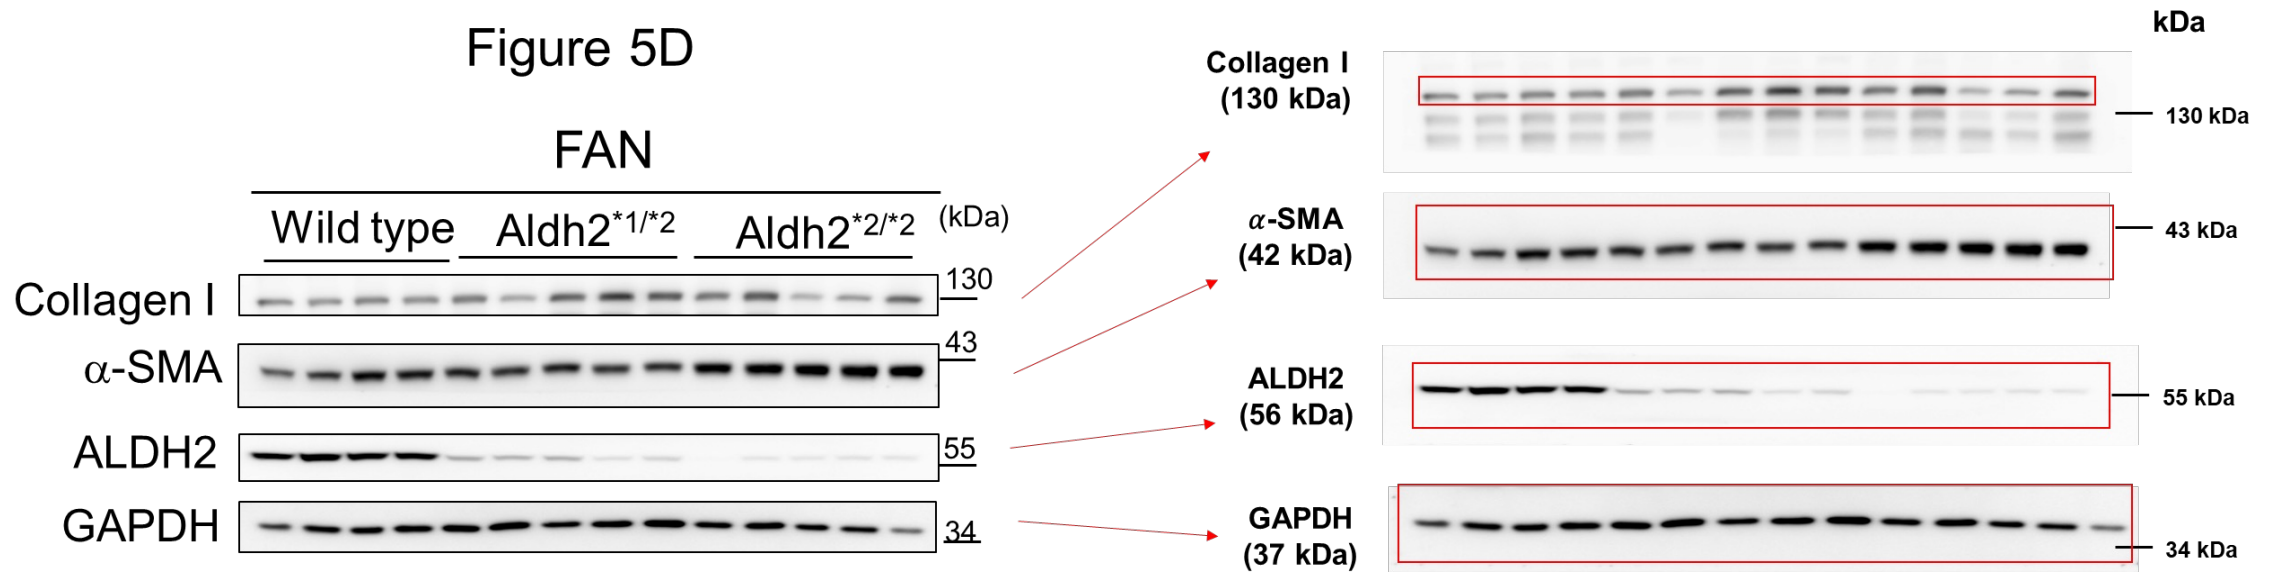



Figure 6A

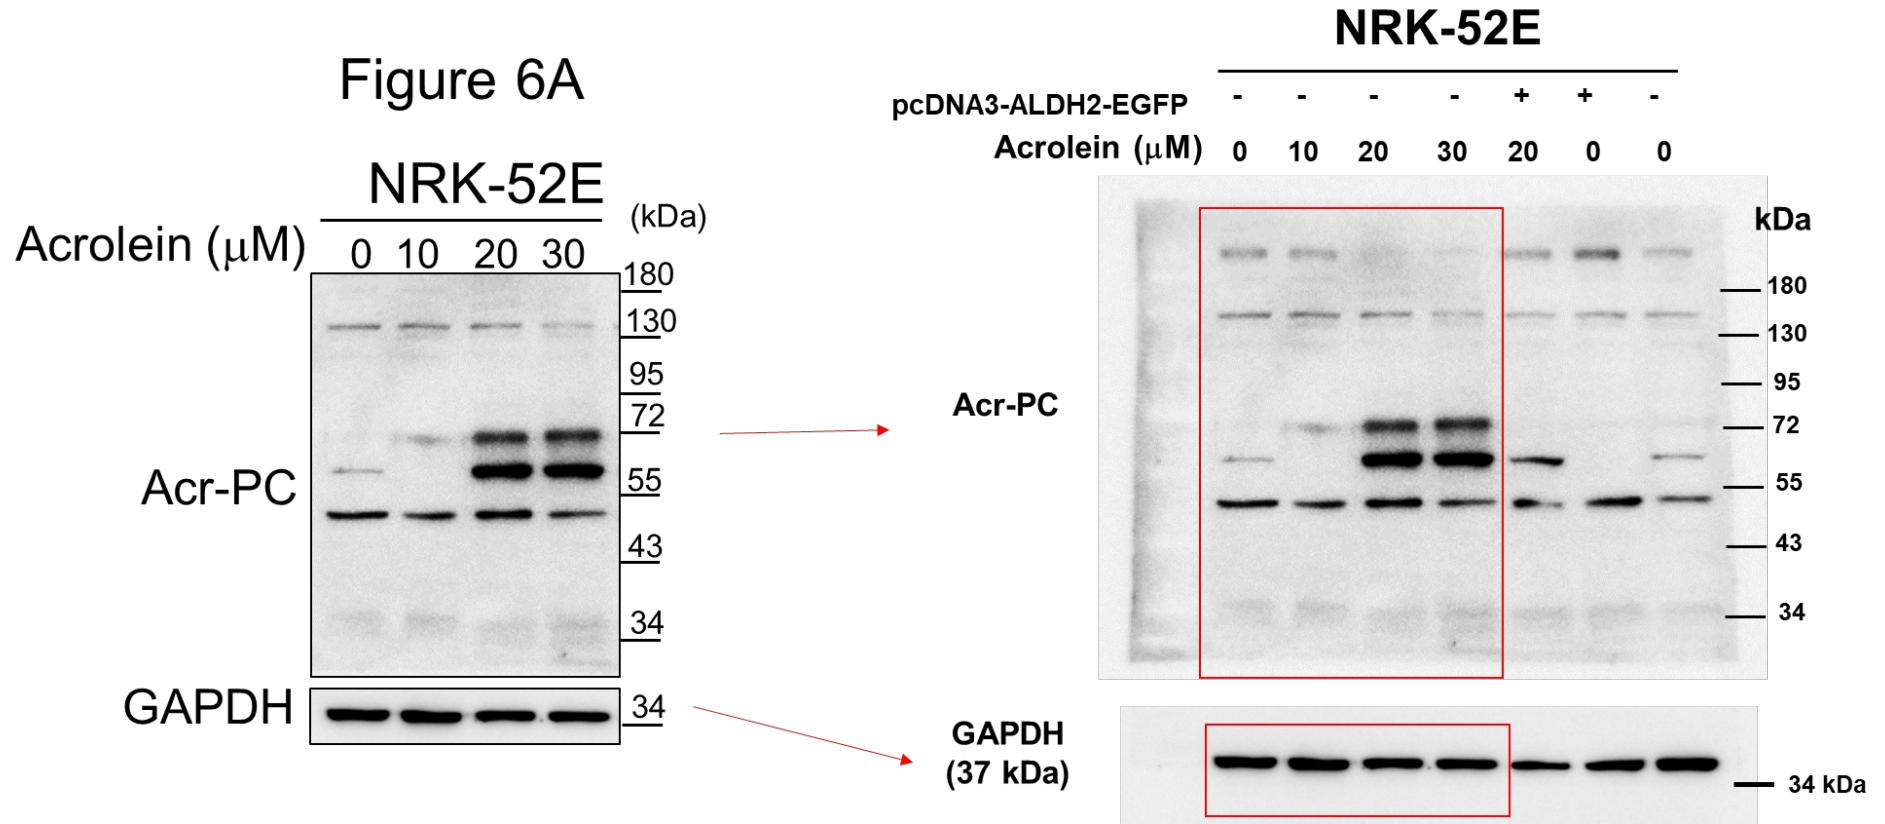

Figure 6E

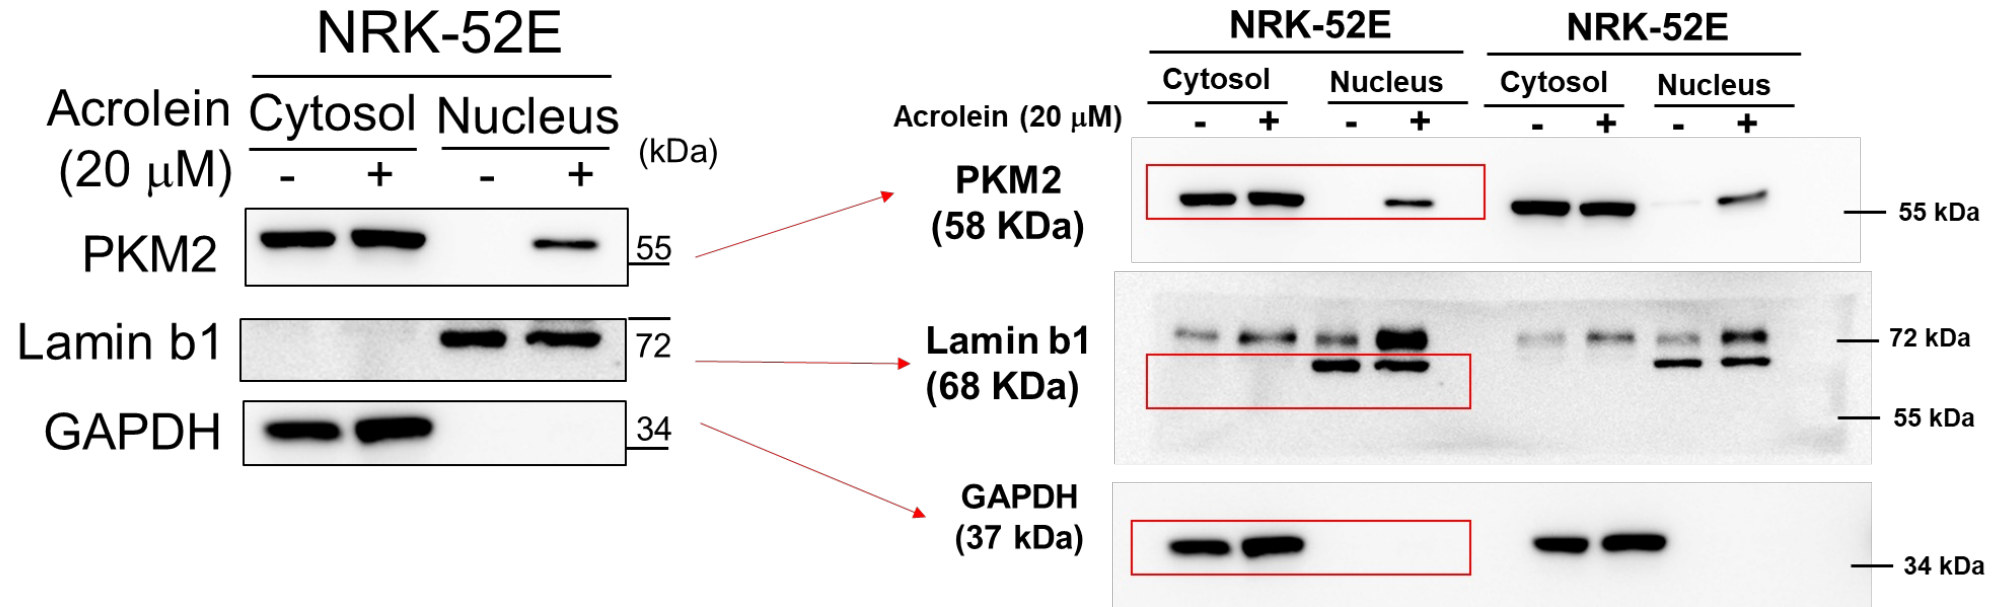

Figure 6F

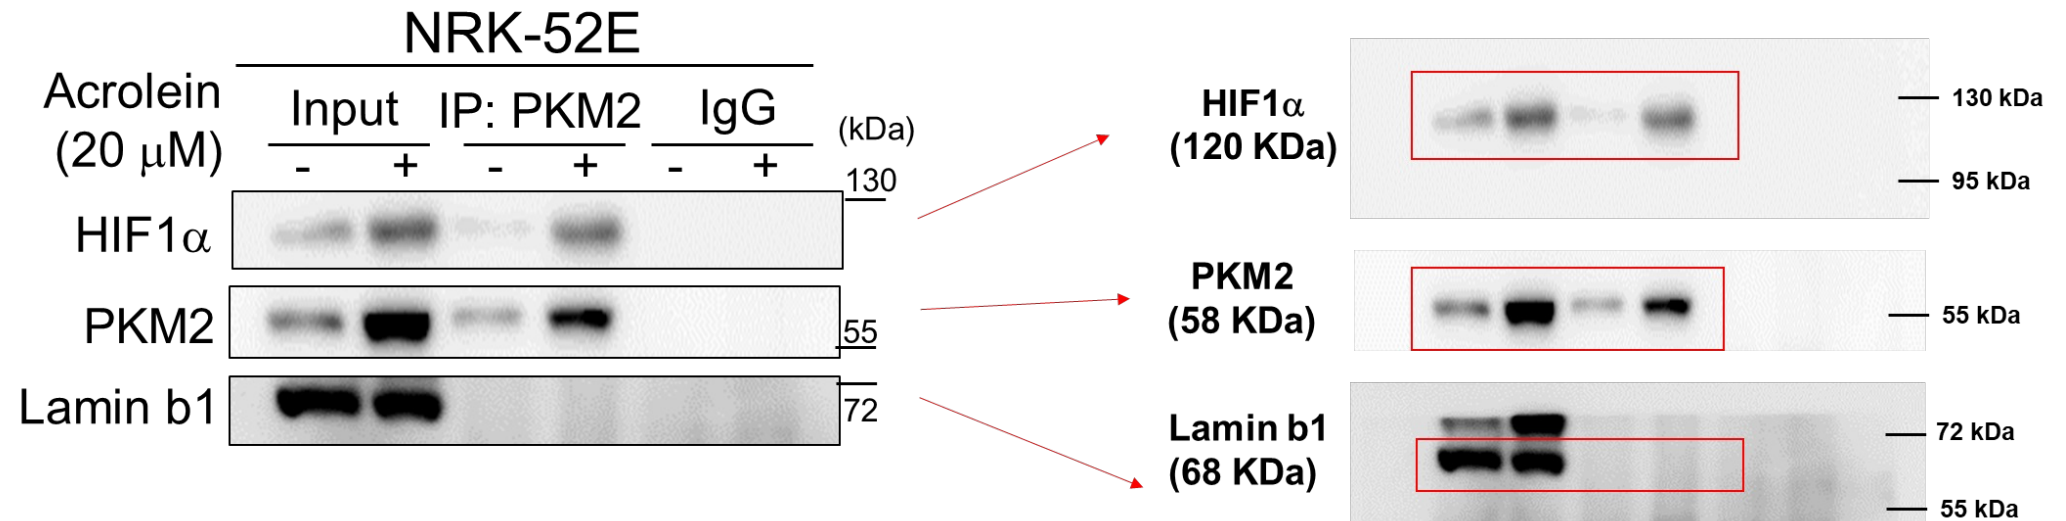

Figure 6H

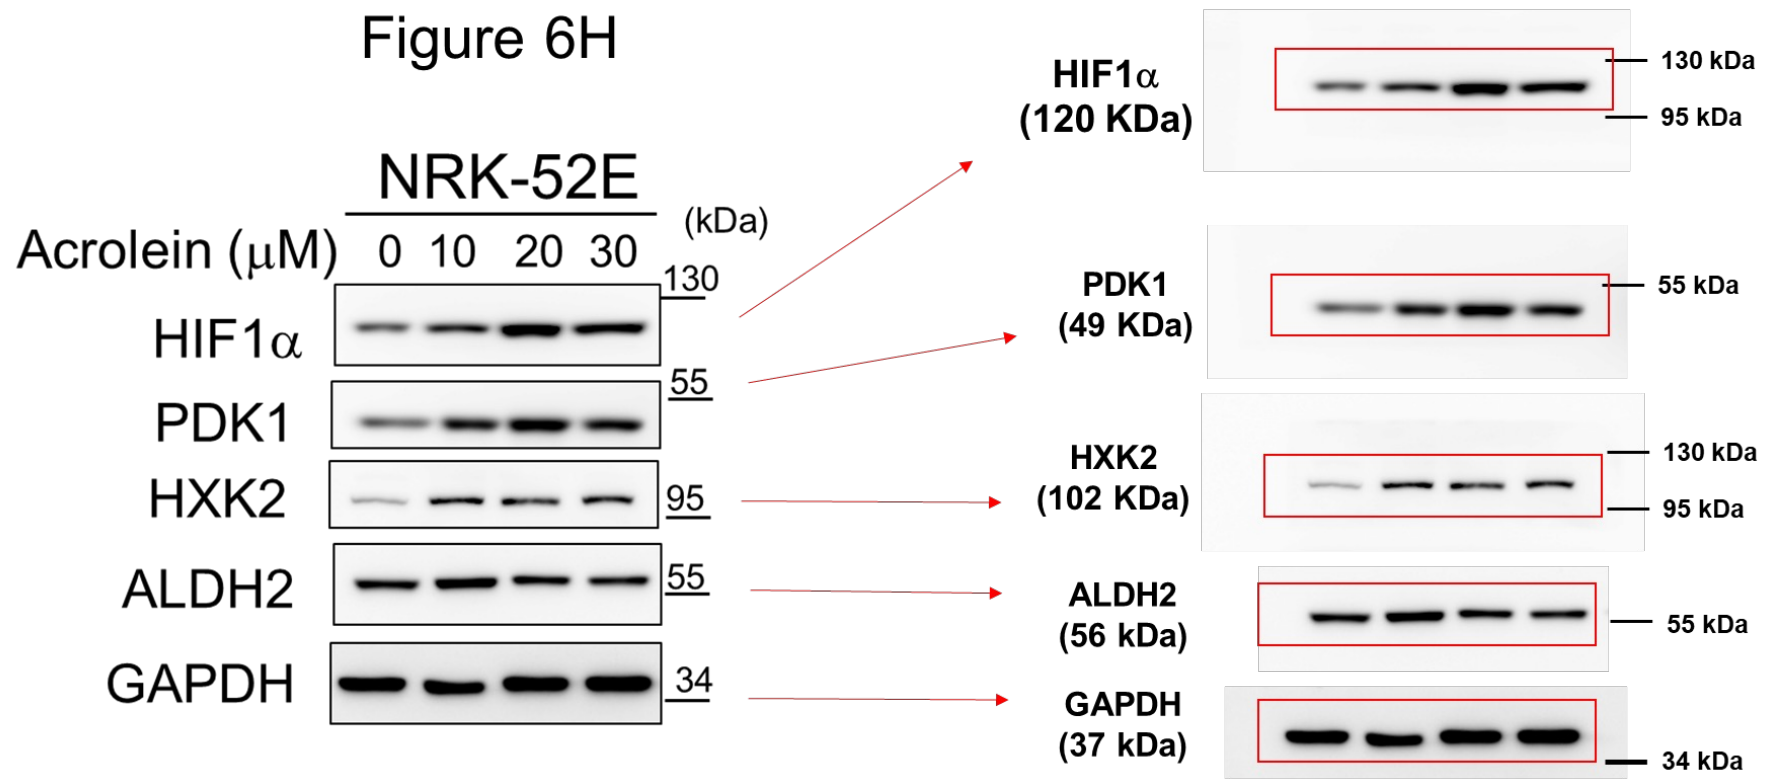

Figure 6l

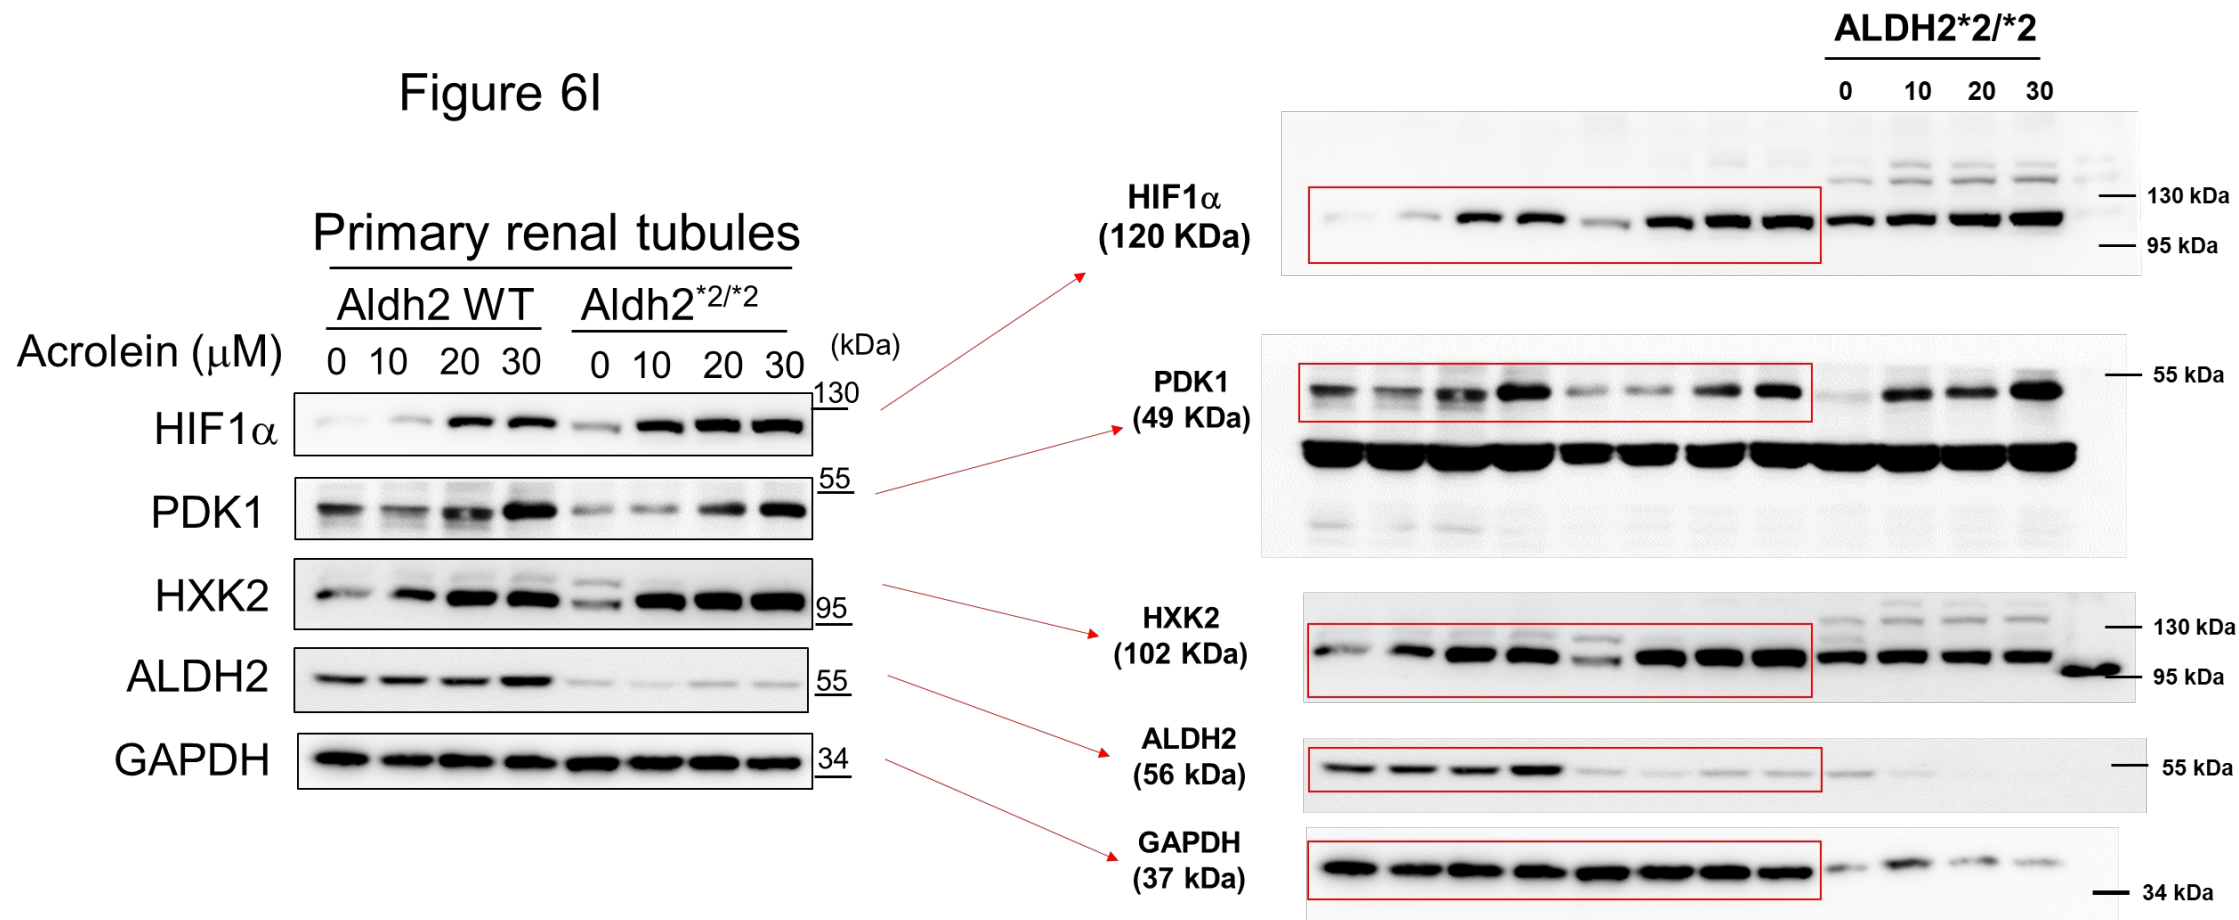

Figure 6K

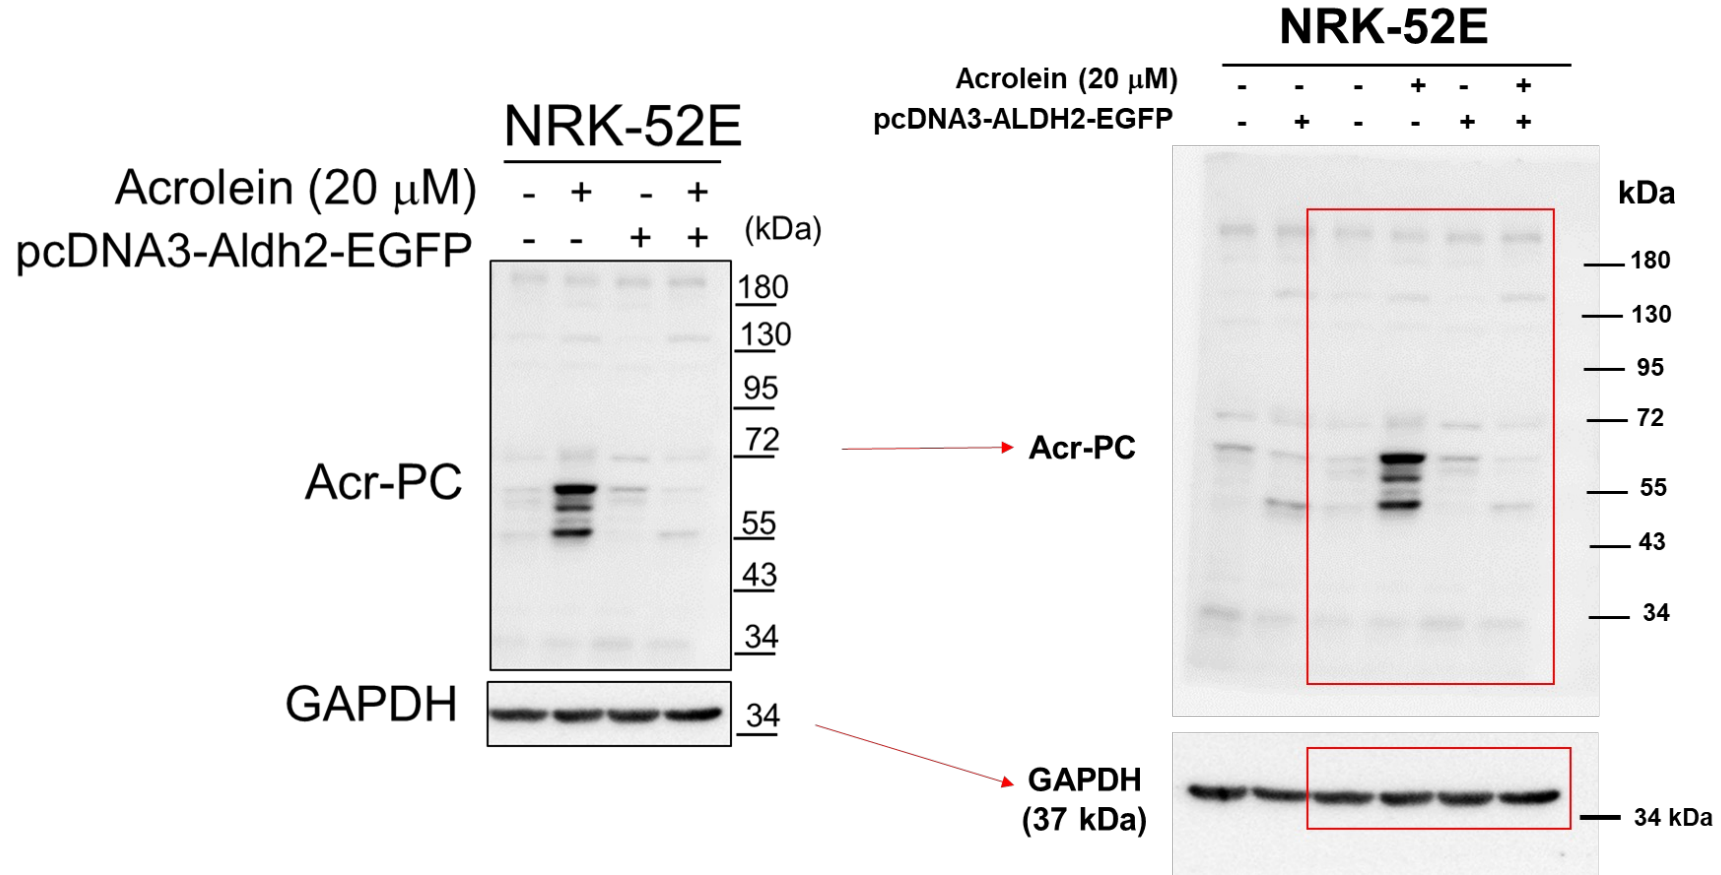

Figure 6L

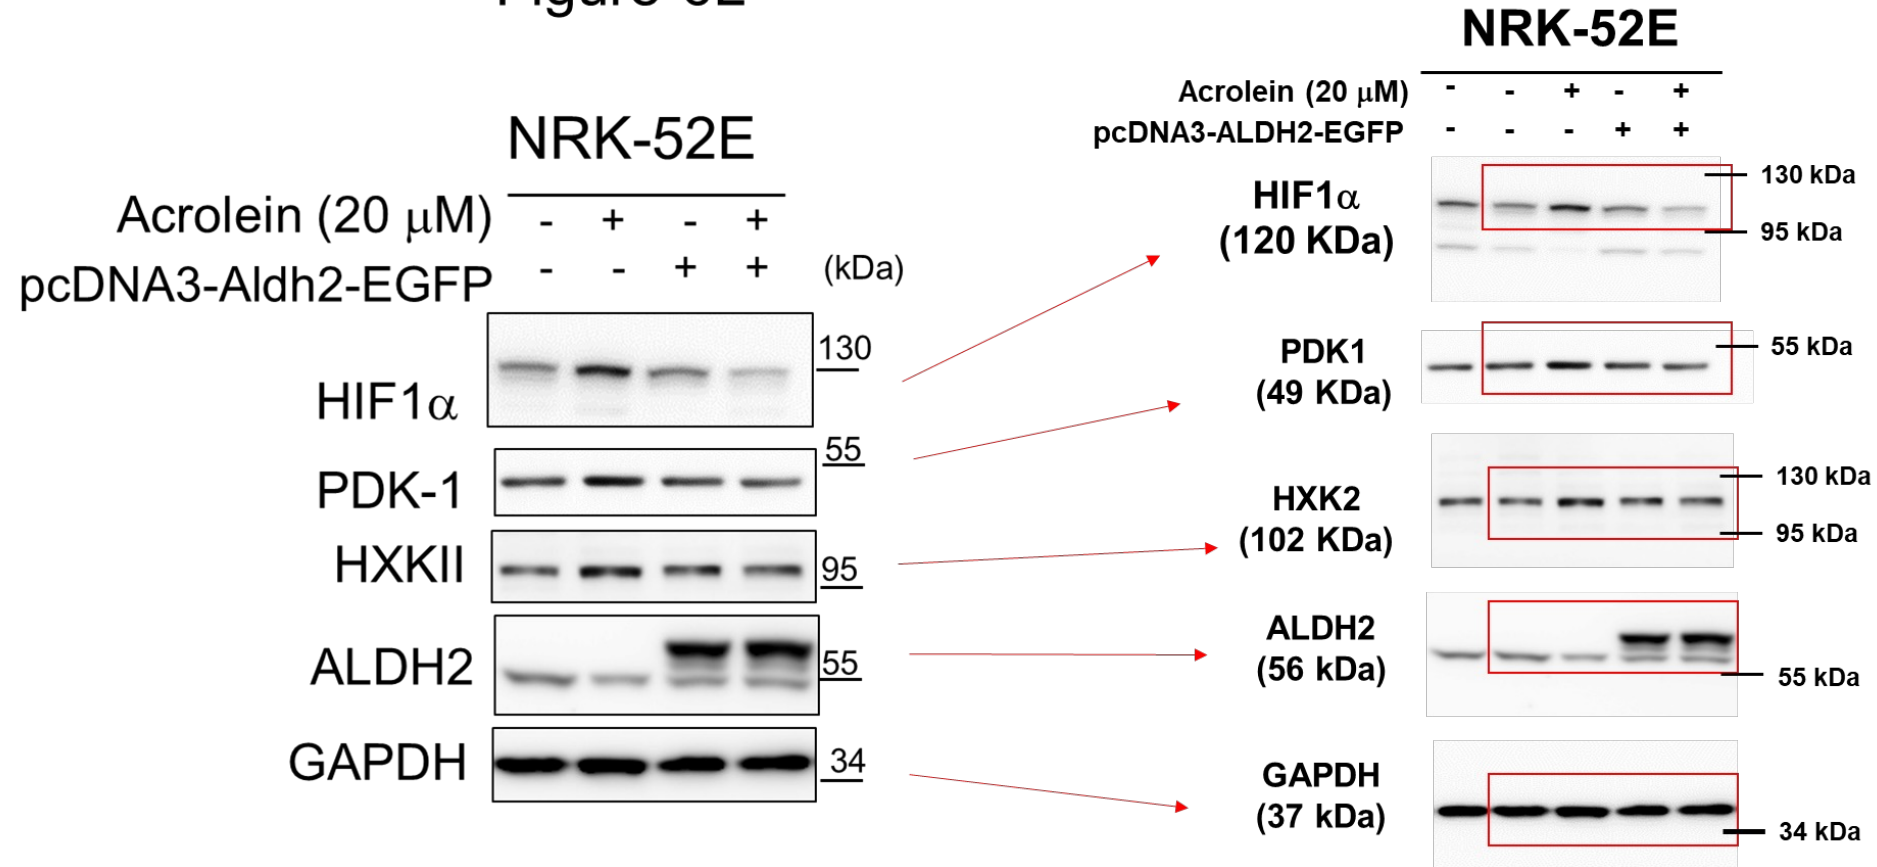



Figure 7B

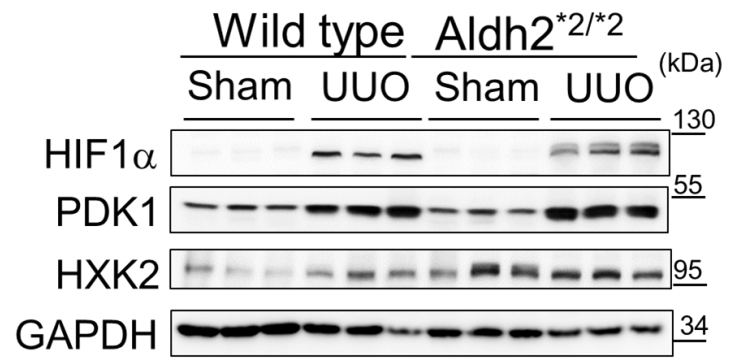

HIF1α  
(120 KDa)

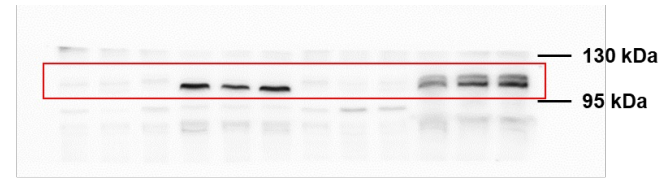

PDK1  
(49 KDa)

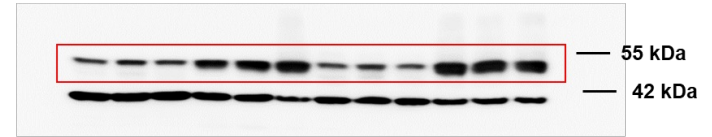

HXK2  
(102 KDa)

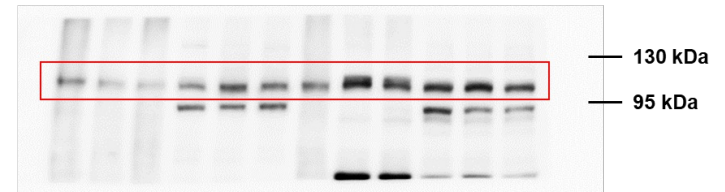

GAPDH  
(37 kDa)

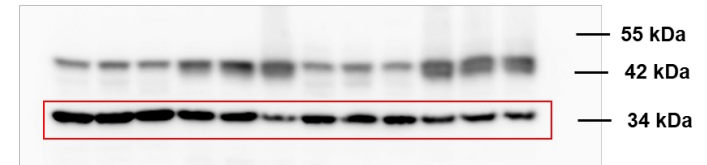

Figure 7D left panel

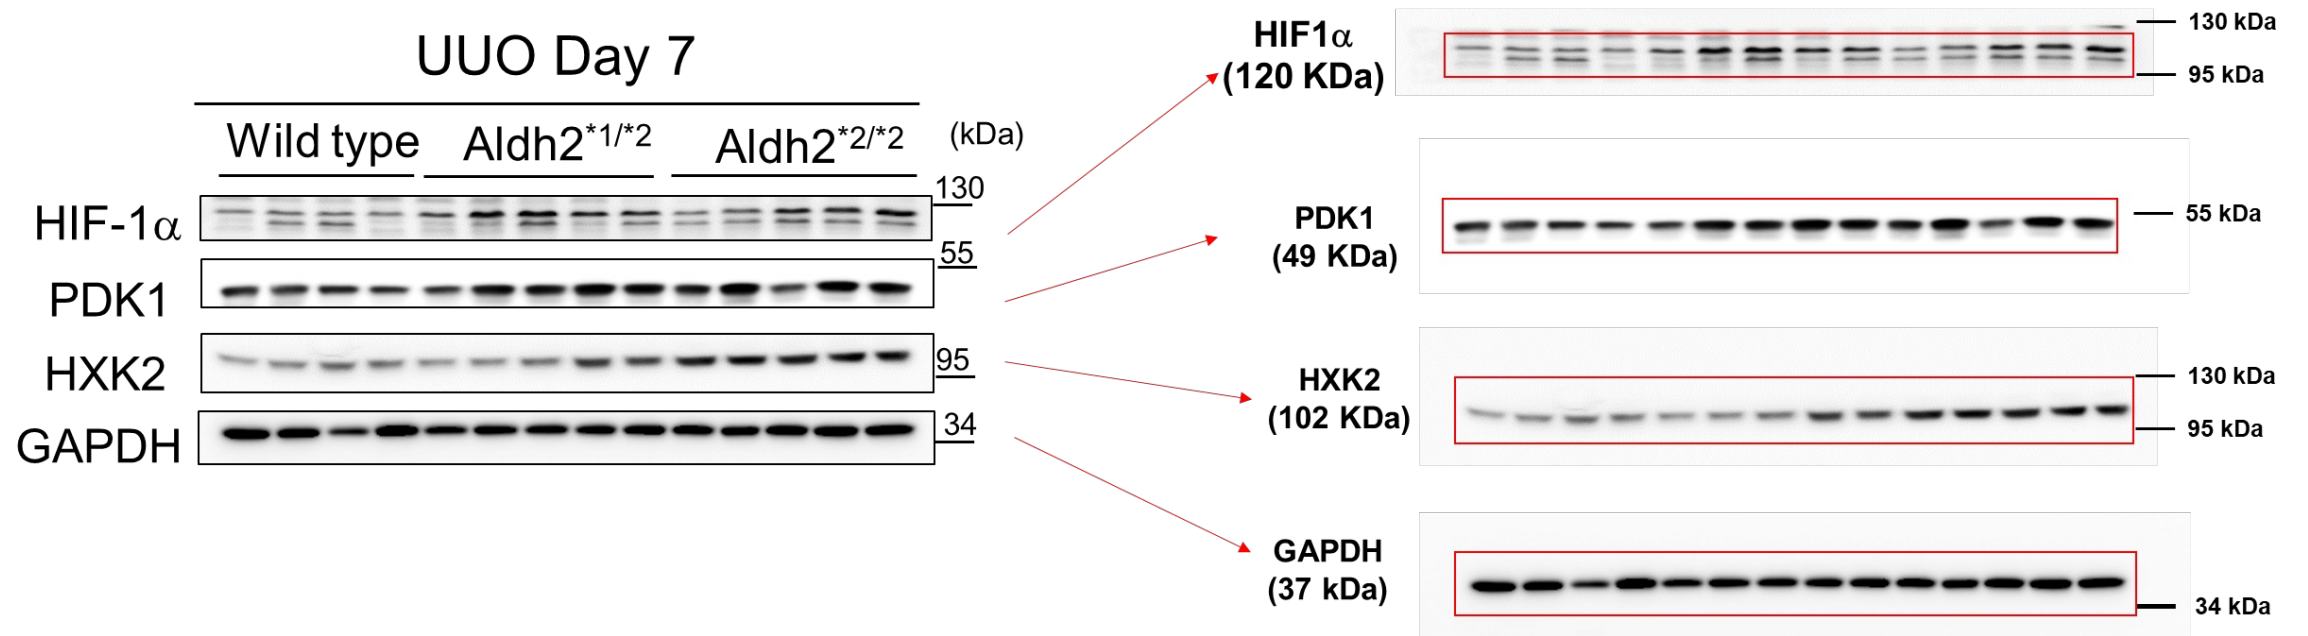

Figure 7D right panel

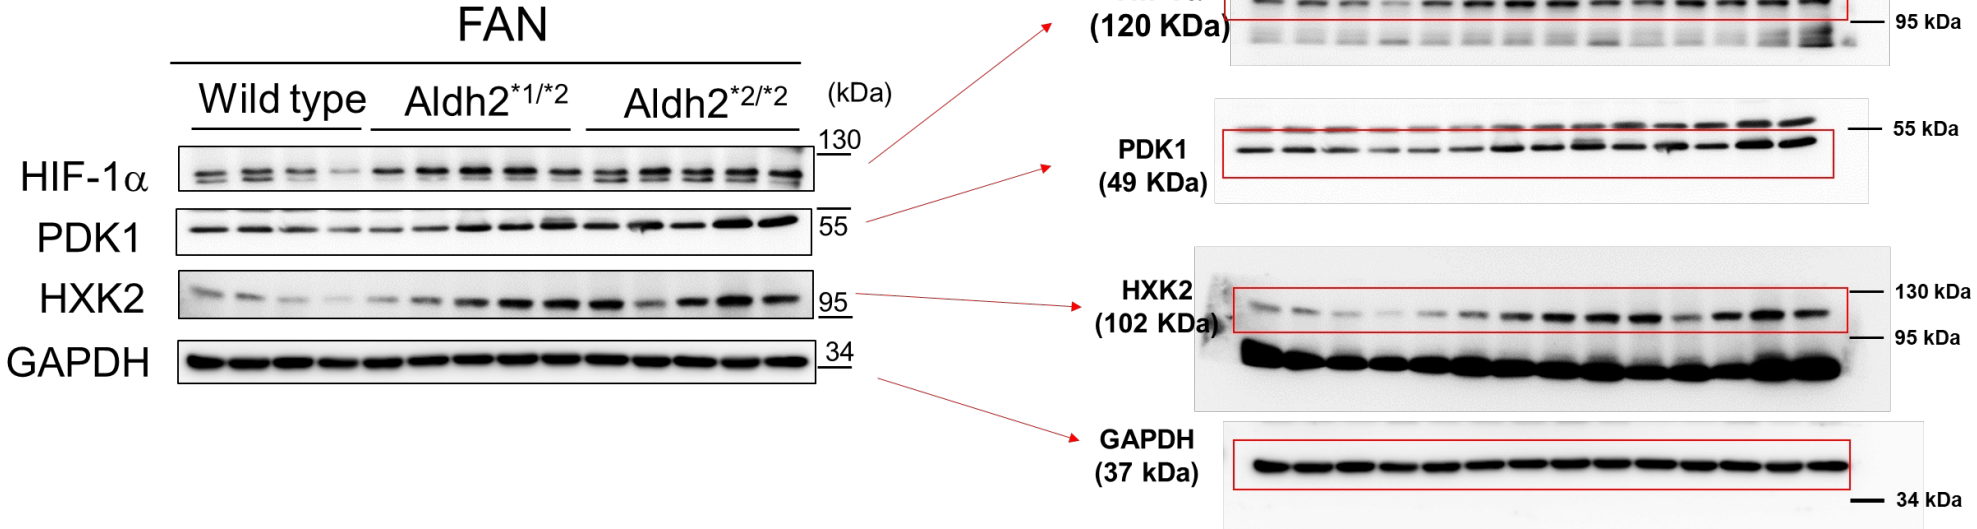

Figure 7E

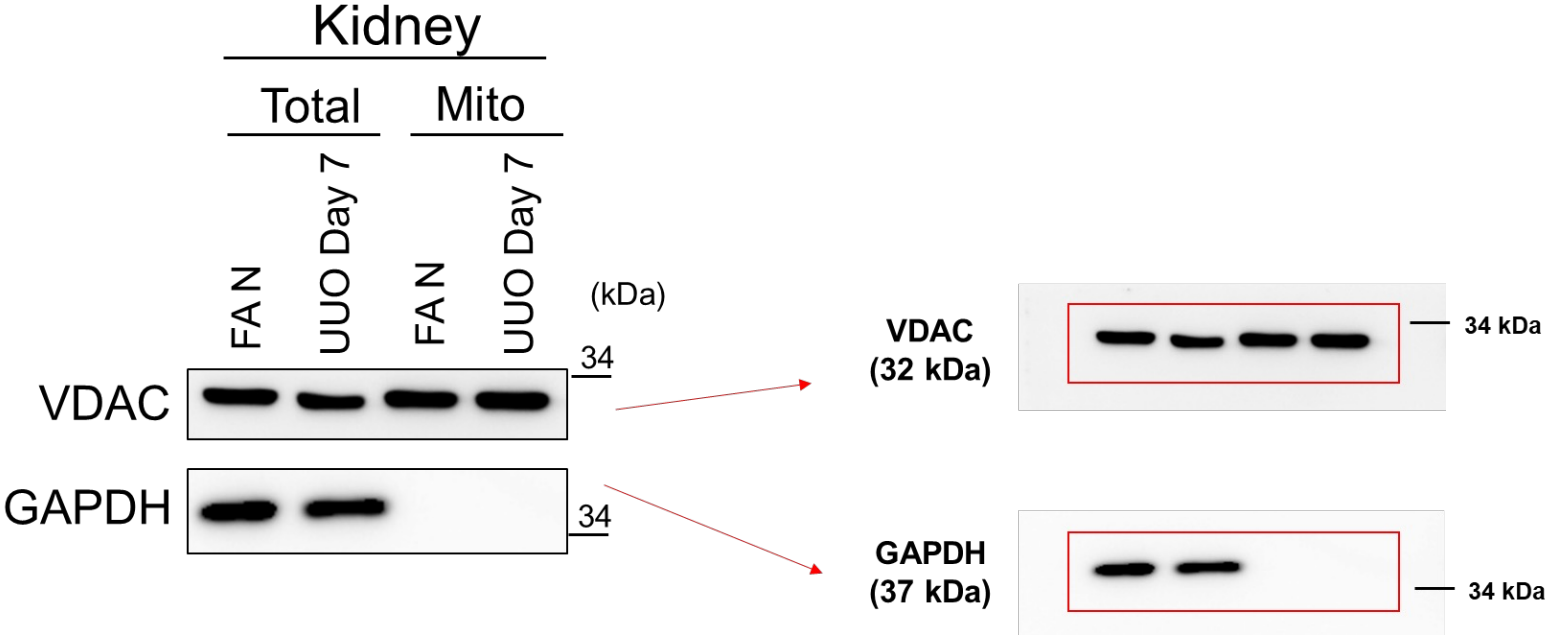

Figure 8C upper panel

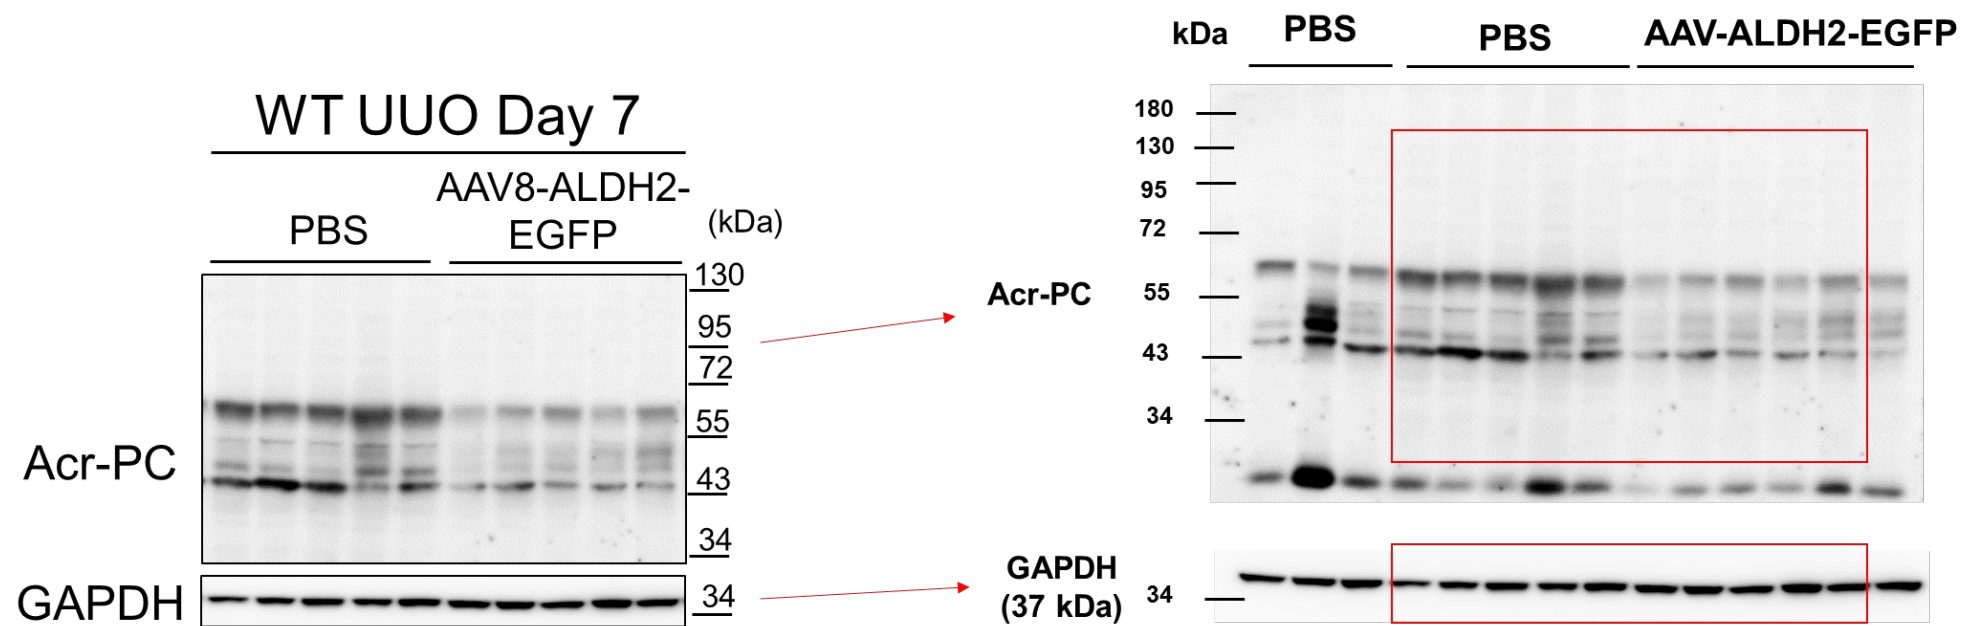

Figure 8C lower panel

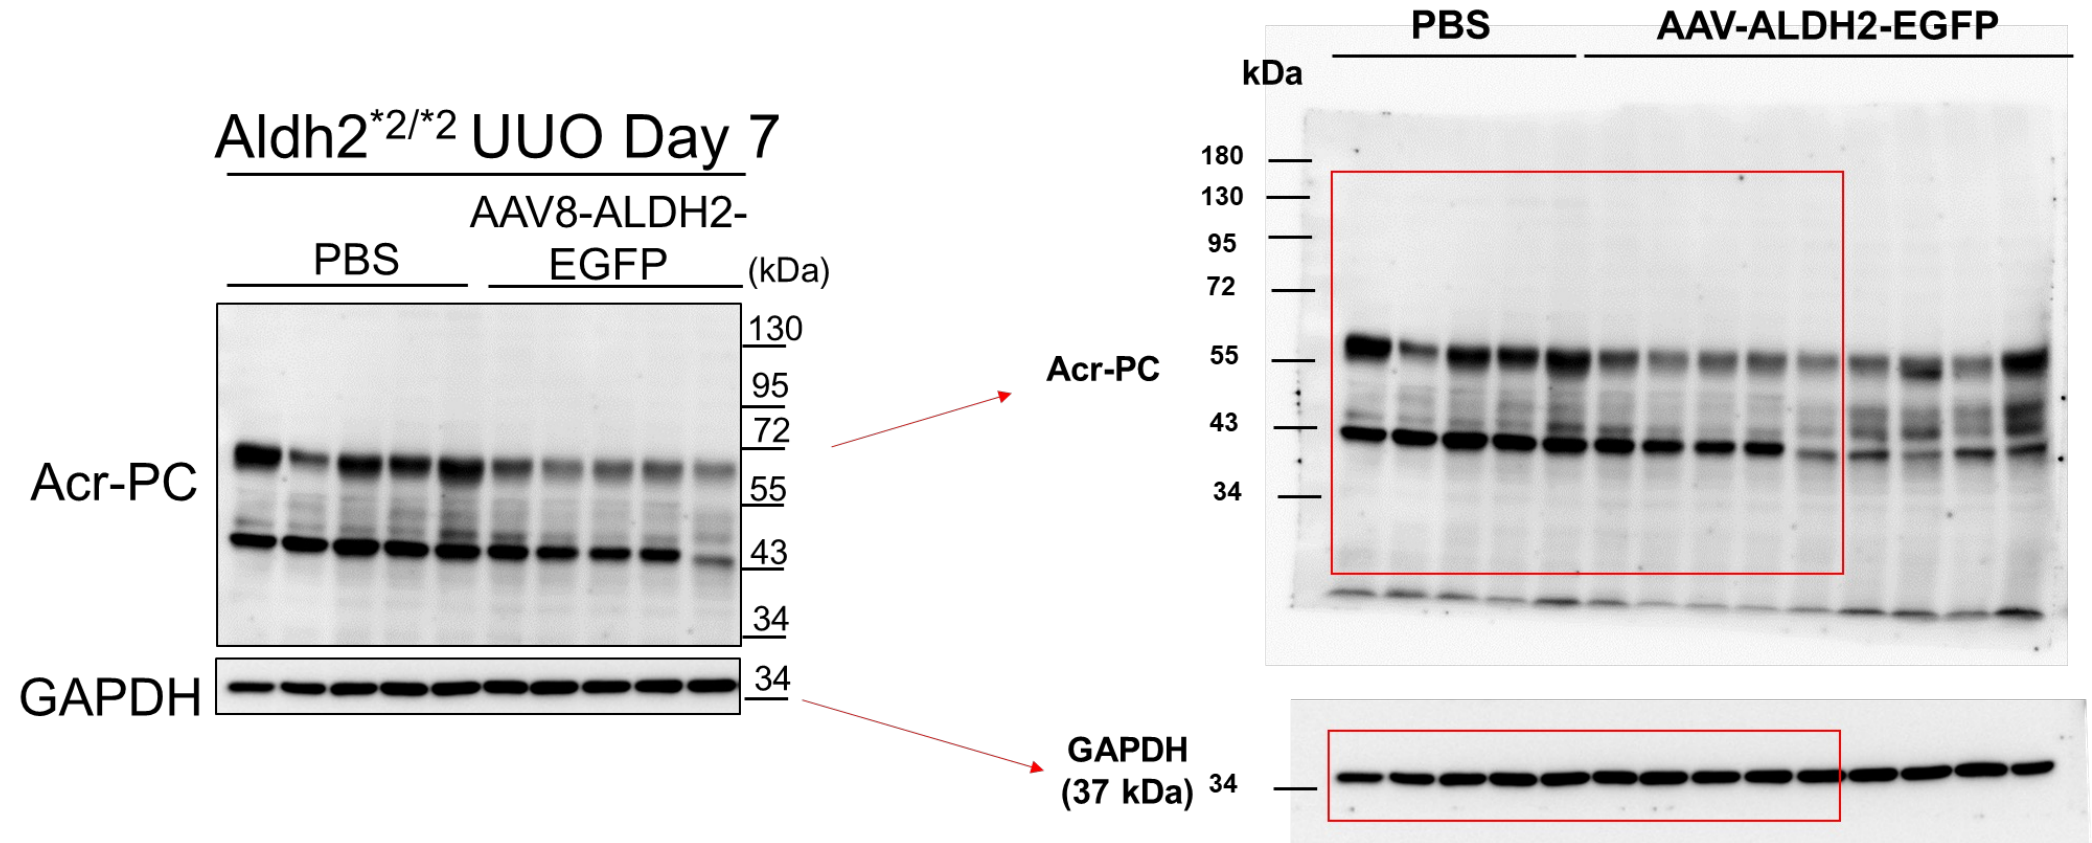

Figure 8D left panel

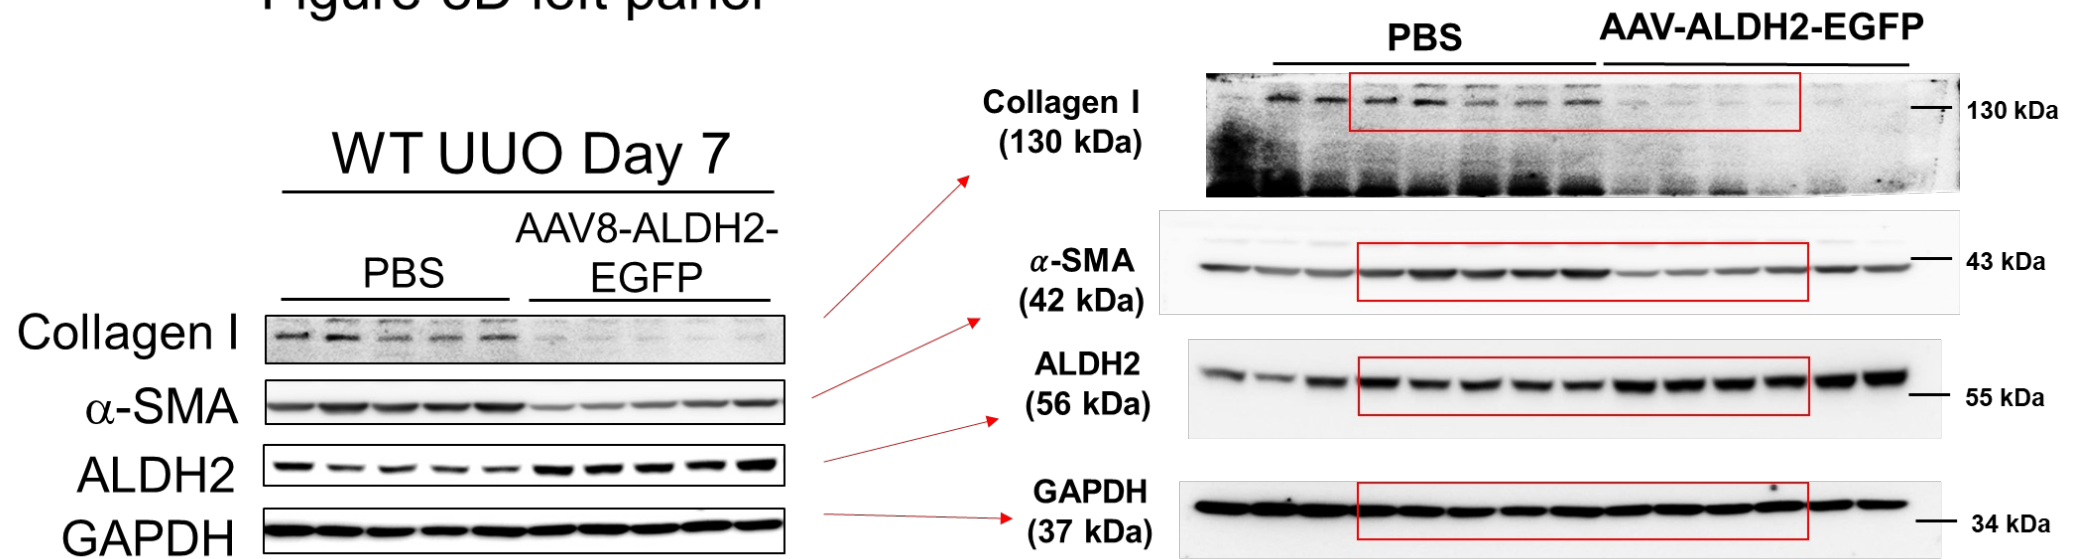



Figure 8D right panel

Aldh2<sup>\*2/\*2</sup> UUO Day 7

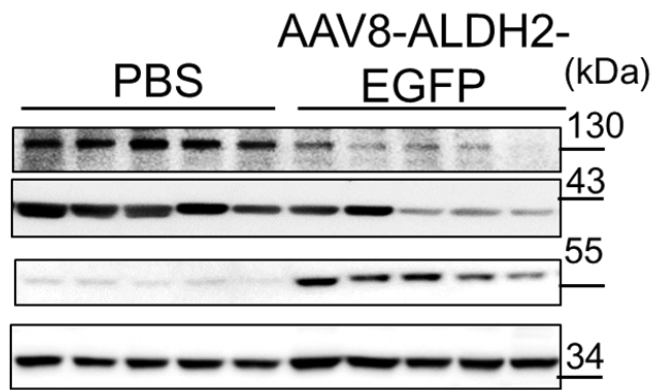

Collagen I  
(130 kDa)

$\alpha$ -SMA  
(42 kDa)

ALDH2  
(56 kDa)

GAPDH  
(37 kDa)

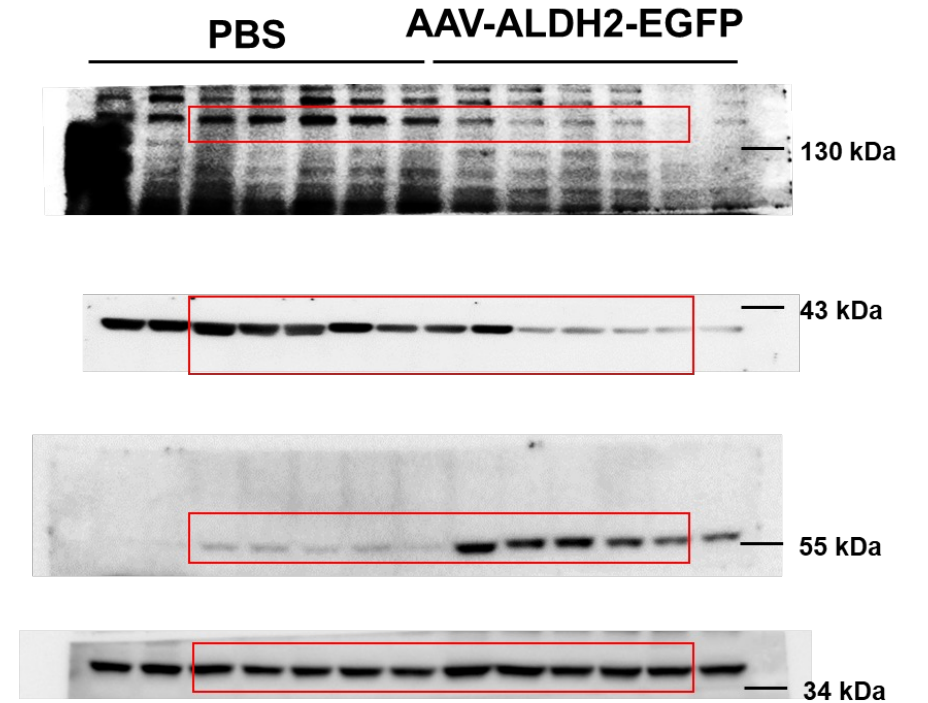

Supplement: jciinsight-9-179871-s021.pdf [file jciinsight-9-179871-s021.pdf]
